# Supplementary material
Source: PubMed Central journal article supplement (PMC5527532)
Supplement: MOL2-3-469-s002.pdf [file MOL2-3-469-s002.pdf]

Fig. S2. Bergamaschi et al.

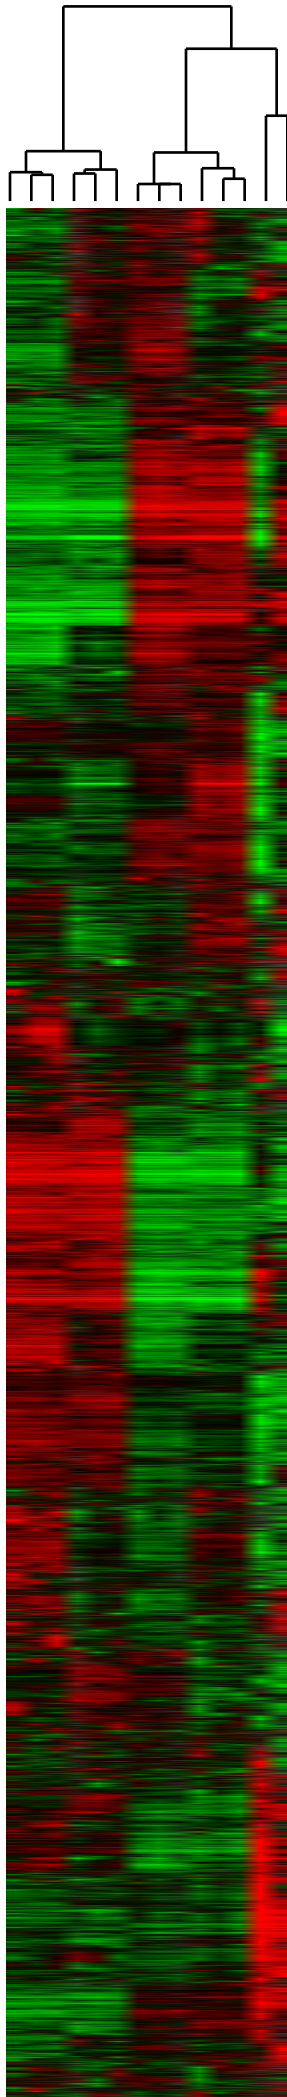

Genes upregulated by MAS98.12 Xengrafts

Genes upregulated by MAS98.06 Xengrafts

Genes upregulated by Primary Tumors
