# Supplementary material
Source: PubMed Central journal article supplement (PMC5527532)
Supplement: MOL2-3-469-s004.pdf [file MOL2-3-469-s004.pdf]

**Table S1 Bergamachi et al**

**PCR and sequencing primers for the *TP53* gene**

| Exons <sup>1</sup> | Forward primer                | Reverse primer                 | Fragment length (bp) |
|--------------------|-------------------------------|--------------------------------|----------------------|
| 2,3,4              | GCC GAG CTG TCT CAG ACAC      | GAA ATG CAG GGG GAT ACG        | 811                  |
| 5,6                | TTT CTT TGC TGC CGT CTTC      | TTG CAC ATC TCA TGG GGT<br>TA  | 588                  |
| 7                  | GAC CAT CCT GGC TAA CGG       | CAC AGG TTA AGA GGT CCC<br>AAA | 595                  |
| 8,9                | TTT GGG ACC TCT TAA CCT<br>GT | CAG GCA AAG TCA TAG AAC<br>CAT | 733                  |
| 10                 | CAT GTT GCT TTT GTA CCG<br>TC | GGC AAG AAT GTG GTT ATA<br>GGA | 396                  |
| 11                 | AAG GGA AGA TTA CGA GACT      | TAA GCT GGT ATG TCC TAC<br>TC  | 500                  |

<sup>1</sup>PCR fragments cover more than one exon where possible
