# Supplementary material
Source: PubMed Central journal article supplement (PMC5527532)
Supplement: MOL2-3-469-s005.pdf [file MOL2-3-469-s005.pdf]

Table S2. Bergamaschi et al

| Name            | Sequence                   | Start bp | Stop bp | Tm |
|-----------------|----------------------------|----------|---------|----|
| Fw_COL4A1_Hs    | CGTAACTAACACACCCTGCTTCAT   | 5230     | 5253    | 58 |
| Rev_COL4A1_Hs   | CACTATTGAAAGCTTATCGCTGTCTT | 5304     | 5279    | 58 |
| Probe_COL4A1_Hs | ACCTCTACTTGCTGAAGGA        | 5256     | 5274    | 69 |
| Fw_COL4A1_Mm    | GGCGGTACACAGTCAGACCATT     | 4805     | 4826    | 60 |
| Rev_COL4A1_Mm   | GGAATAGCCGATCCACAGTGA      | 4877     | 4857    | 59 |
| Probe_COL4A1_Mm | AGTGCCCTAACGGTTGG          | 4837     | 4853    | 70 |
| Fw_CTSB_Hs      | AGACTTGTAGCTGCTGTCTCTCTTTG | 2193     | 2218    | 59 |
| Rev_CTSB_Hs     | AAGAGTCGCAAGAACATGCAGTT    | 2265     | 2243    | 59 |
| Probe_CTSB_Hs   | CCTGCAGAGAATCACGT          | 2221     | 2237    | 70 |
| Fw_CTSB_Mm      | GTCAAAAGCAGGCTAGGGATGT     | 3344     | 3365    | 58 |
| Rev_CTSB_Mm     | AAGGGTCTTGCTTGGACAATATG    | 3412     | 3390    | 58 |
| Probe_CTSB_Mm   | ATGGTAGAGTGTTTGTCC         | 3370     | 3387    | 68 |
| Fw_MMP11_Hs     | GATGGCAGAGGCCCTAAAGG       | 409      | 428     | 60 |
| Rev_MMP11_Hs    | GCCCTCGTGACCTCAGTA         | 475      | 457     | 58 |
| Probe_MMP11_Hs  | TGGAGCGATGTGACGC           | 431      | 446     | 68 |
| Fw_MMP11_Mm     | ACCGGAGAGTCACCGTCATC       | 127      | 146     | 59 |
| Rev_MMP11_Mm    | ATTAGGCAGAGCTGCATGCA       | 193      | 174     | 58 |
| Probe_MMP11_Mm  | AAGAAAGGGCCTCGGT           | 155      | 171     | 70 |
| Fw_PECAM1_Hs    | GCAGCATCGTGGTCAACATAAC     | 1157     | 1178    | 59 |
| Rev_PECAM1_Hs   | CCAGATGTGTGAAGGAAGATTCC    | 1225     | 1203    | 59 |
| Probe_PECAM1_Hs | AACTATTTTCCAAGCCCG         | 1181     | 1198    | 69 |
| Fw_PECAM1_Mm    | CCCCCAGAACATGGATGTAGAAT    | 2242     | 2264    | 60 |
| Rev_PECAM1_Mm   | CAGAGCTTGGTGAGGCTCAAG      | 2308     | 2288    | 59 |
| Probe_PECAM1_Mm | AGAAGTGGAAAGTGTCCCTC       | 2269     | 2286    | 69 |
| Fw_SPARC_Hs     | TTTCACATTAGGCTGTTGGTTCA    | 1674     | 1696    | 58 |
| Rev_SPARC_Hs    | GCTGACCACTTCCCAGAGAACT     | 1741     | 1720    | 58 |
| Probe_SPARC_Hs  | TTGGGAGCACGGACTG           | 1702     | 1717    | 70 |
| Fw_SPARC_Mm     | TGGCTGTTGGTTTTAGTTTTGGT    | 1639     | 1661    | 59 |
| Rev_SPARC_Mm    | CCCGGCAAGAACCTGAAA         | 1721     | 1704    | 58 |
| Probe_SPARC_Mm  | ACATCACTCAACTGCAATT        | 1681     | 1699    | 70 |
| Fw_GAPDH_Hs     | GACCTGACCTGCCGTCTAGAAA     | 832      | 853     | 59 |
| Rev_GAPDH_Hs    | CCTGCTTCAACCACCTTCTTGA     | 895      | 875     | 59 |
| Probe_GAPDH_Hs  | ACCTGCCAAATATGATGAC        | 855      | 873     | 69 |
| Fw_GAPDH_Mm     | CATGGCCTTCCGTGTTCCCTA      | 734      | 753     | 60 |
| Rev_GAPDH_Mm    | GCGGCACGTCAGATCCA          | 788      | 772     | 59 |
| Probe_GAPDH_Mm  | CCCCAATGTGTCCGTC           | 755      | 770     | 69 |
