# Supplementary material
Source: PubMed Central journal article supplement (PMC5527532)
Supplement: MOL2-3-469-s006.pdf [file MOL2-3-469-s006.pdf]

Table S3. Bergamaschi et al.

| Symbol          | Name                                                                                               | Acc Number   |
|-----------------|----------------------------------------------------------------------------------------------------|--------------|
| A2M             | Alpha-2-macroglobulin                                                                              | CR749334     |
| ACP5            | Acid phosphatase 5, tartrate resistant                                                             | BM804974     |
| ADAM8           | ADAM metalloproteinase domain 8                                                                    | NM_001109    |
| AIF1            | Allograft inflammatory factor 1                                                                    | U95213       |
| AMICA1          | Adhesion molecule, interacts with CXADR antigen 1                                                  | AK090409     |
| ANTXR1          | Anthrax toxin receptor 1                                                                           | AF279145     |
| AOC3            | Amine oxidase, copper containing 3 (vascular adhesion protein 1)                                   | BC036368     |
| APBB1IP         | Amyloid beta (A4) precursor protein-binding, family B, member 1 interacting protein                | NM_019043    |
| APOL3           | Apolipoprotein L, 3                                                                                | NM_145641    |
| AQP1            | Aquaporin 1 (Colton blood group)                                                                   | NM_198098    |
| ARHGAP25        | Rho GTPase activating protein 25                                                                   | NM_001007231 |
| ARPC1B          | Actin related protein 2/3 complex, subunit 1B, 41kDa                                               | BM907771     |
| BIRC4BP         |                                                                                                    |              |
| BNC2            |                                                                                                    |              |
| BTN3A2          | Butyrophilin, subfamily 3, member A2                                                               | NM_007047    |
| BTN3A3          | Butyrophilin, subfamily 3, member A3                                                               | AB209581     |
| C16orf30        |                                                                                                    |              |
| C1orf54         | Chromosome 1 open reading frame 54                                                                 | BQ718781     |
| C1S             | Complement component 1, s subcomponent                                                             | AK126711     |
| C22orf35::MIAT  |                                                                                                    |              |
| C4orf18         | Chromosome 4 open reading frame 18                                                                 | AL832589     |
| CASP1           | Caspase 1, apoptosis-related cysteine peptidase (interleukin 1, beta, convertase)                  | AK223503     |
| CCL2            | Chemokine (C-C motif) ligand 2                                                                     | BU570769     |
| CCR1            | Chemokine (C-C motif) receptor 1                                                                   | NM_001295    |
| CD163           | CD163 molecule                                                                                     | NM_004244    |
| CD2             | CD2 molecule                                                                                       | NM_001767    |
| CD247           | CD247 molecule                                                                                     | AK223325     |
| CD300A          | CD300a molecule                                                                                    | NM_007261    |
| CD36            | CD36 molecule (thrombospondin receptor)                                                            | AL832074     |
| CD52            | CD52 molecule                                                                                      | BQ276596     |
| CD53            | CD53 molecule                                                                                      | NM_001040033 |
| CDR1            | Cerebellar degeneration-related protein 1, 34kDa                                                   | AK054921     |
| CENTA2          | Centaurin, alpha 2                                                                                 | NM_018404    |
| CENTA2          | Centaurin, alpha 2                                                                                 | NM_018404    |
| CFD             | Complement factor D (adipsin)                                                                      | BQ712715     |
| CFH             | Complement factor H                                                                                | AK226113     |
| CFH::CFHR1      |                                                                                                    |              |
| CIDEA           | Cell death-inducing DFFA-like effector a                                                           | AK122762     |
| CLEC2B          | C-type lectin domain family 2, member B                                                            | NM_005127    |
| CMKOR1          |                                                                                                    |              |
| CNN1            | Calponin 1, basic, smooth muscle                                                                   | BC036307     |
| COL10A1         | Collagen, type X, alpha 1 (Schmid metaphyseal chondrodysplasia)                                    | NM_000493    |
| COL12A1         | Collagen, type XII, alpha 1                                                                        | NM_004370    |
| COL15A1         | Collagen, type XV, alpha 1                                                                         | NM_001855    |
| COL1A1          |                                                                                                    |              |
| COL1A2          | Collagen, type I, alpha 2                                                                          | J03464       |
| COL4A2          | Collagen, type IV, alpha 2                                                                         | NM_001846    |
| COL5A2          | Collagen, type V, alpha 2                                                                          | NM_000393    |
| COL8A1          | Collagen, type VIII, alpha 1                                                                       | AF170702     |
| COLEC12         | Collectin sub-family member 12                                                                     | AB052103     |
| CPVL::LOC652106 |                                                                                                    |              |
| CSF1R           | Colony stimulating factor 1 receptor, formerly McDonough feline sarcoma viral (v-fms) oncogene hom | X03663       |
| CTSB            | Cathepsin B                                                                                        | NM_147780    |
| CTSC            | Cathepsin C                                                                                        | BX537913     |
| CTSK            | Cathepsin K                                                                                        | NM_000396    |
| CXCL12          | Chemokine (C-X-C motif) ligand 12 (stromal cell-derived factor 1)                                  | AK090482     |
| CYBB            | Cytochrome b-245, beta polypeptide (chronic granulomatous disease)                                 | NM_000397    |
| DERL3           | Der1-like domain family, member 3                                                                  | AK125830     |
| DHRS8           |                                                                                                    |              |
| DKK3            | Dickkopf homolog 3 (Xenopus laevis)                                                                | NM_015881    |
| DKK3            | Dickkopf homolog 3 (Xenopus laevis)                                                                | NM_015881    |
| DLC1            | Deleted in liver cancer 1                                                                          | NM_182643    |

|                    |                                                                                    |              |
|--------------------|------------------------------------------------------------------------------------|--------------|
| DOCK11             | Dedicator of cytokinesis 11                                                        | NM_144658    |
| DUSP1              | Dual specificity phosphatase 1                                                     | AK127679     |
| EBI2               | Epstein-Barr virus induced gene 2 (lymphocyte-specific G protein-coupled receptor) | NM_004951    |
| EFEMP1             | EGF-containing fibulin-like extracellular matrix protein 1                         | NM_004105    |
| F13A1              | Coagulation factor XIII, A1 polypeptide                                            | BC027963     |
| F7                 | Coagulation factor VII (serum prothrombin conversion accelerator)                  | NM_000131    |
| FABP4              | Fatty acid binding protein 4, adipocyte                                            | CB999901     |
| FAM14A             | Family with sequence similarity 14, member A                                       | BU596980     |
| FAP                | Fibroblast activation protein, alpha                                               | U09278       |
| FBN1               | Fibrillin 1                                                                        | NM_000138    |
| FCGR3A             | Fc fragment of IgG, low affinity IIIa, receptor (CD16a)                            | NM_000569    |
| FLJ21438           | Hypothetical protein FLJ21438                                                      | AK024488     |
| FN1                | Fibronectin 1                                                                      | NM_212482    |
| FTL                |                                                                                    |              |
| FZD4               | Frizzled homolog 4 (Drosophila)                                                    | AB032417     |
| G0S2               |                                                                                    |              |
| GBP5               | Guanylate binding protein 5                                                        | AK090479     |
| GMFG               | Glia maturation factor, gamma                                                      | BU934772     |
| GNG11              | Guanine nucleotide binding protein (G protein), gamma 11                           | BF971151     |
| HAVCR2             | Hepatitis A virus cellular receptor 2                                              | BC063431     |
| HBB                | Hemoglobin, beta                                                                   | BM811415     |
| HCLS1              | Hematopoietic cell-specific Lyn substrate 1                                        | AK124015     |
| HEG1               | HEG homolog 1 (zebrafish)                                                          | NM_020733    |
| HLA-A              |                                                                                    |              |
| HLA-C              |                                                                                    |              |
| HLA-C::IGKC        |                                                                                    |              |
| HLA-C::IGKC        |                                                                                    |              |
| HLA-C::IGKC        |                                                                                    |              |
| HLA-DMB            | Major histocompatibility complex, class II, DM beta                                | AB209577     |
| HLA-DOA            | Major histocompatibility complex, class II, DO alpha                               | NM_002119    |
| HLA-DPA1           | Major histocompatibility complex, class II, DP alpha 1                             | AB209058     |
| HLA-DPB1           | Major histocompatibility complex, class II, DP beta 1                              | BC013184     |
| HLA-DPB1           | Major histocompatibility complex, class II, DP beta 1                              | BC013184     |
| HLA-DQA1           |                                                                                    |              |
| HLA-DRB1           |                                                                                    |              |
| HLA-DRB1           |                                                                                    |              |
| HLA-DRB1           |                                                                                    |              |
| HLA-DRB1::HLA-DRB5 |                                                                                    |              |
| HTRA1              | HtrA serine peptidase 1                                                            | NM_002775    |
| HTRA3              | HtrA serine peptidase 3                                                            | BC035717     |
| IFI16::PYHIN1      |                                                                                    |              |
| IFI16::PYHIN1      |                                                                                    |              |
| IFI27              | Interferon, alpha-inducible protein 27                                             | BQ053892     |
| IFI27              | Interferon, alpha-inducible protein 27                                             | BQ053892     |
| IFI44              | Interferon-induced protein 44                                                      | BX537508     |
| IGF1               | Insulin-like growth factor 1 (somatomedin C)                                       | NM_001111283 |
| IGFBP7             | Insulin-like growth factor binding protein 7                                       | BX648756     |
| IGFBP7             | Insulin-like growth factor binding protein 7                                       | BX648756     |
| IGHA1::IGHG1       |                                                                                    |              |
| IGHG1              | Immunoglobulin heavy constant mu                                                   | AK090461     |
| IGKC               | Netrin 2-like (chicken)                                                            | AK128524     |
| IGKV1D-13          | Immunoglobulin kappa variable 1D-13                                                | BG482625     |
| IGL@               |                                                                                    |              |
| IGL@               |                                                                                    |              |
| IGL@               |                                                                                    |              |
| IGLL1              | Immunoglobulin lambda-like polypeptide 1                                           | NM_020070    |
| IGLL1              | Immunoglobulin lambda-like polypeptide 1                                           | NM_020070    |
| IGLV1-44           | Immunoglobulin lambda variable 1-44                                                | BQ708343     |
| IL10RA             | Interleukin 10 receptor, alpha                                                     | AB209626     |
| IL3RA              | Interleukin 3 receptor, alpha (low affinity)                                       | BC035407     |
| IL7R               |                                                                                    |              |
| INHBA              | Inhibin, beta A                                                                    | BX648811     |
| KCNH2::RARRES2     |                                                                                    |              |

|            |                                                                                                        |              |
|------------|--------------------------------------------------------------------------------------------------------|--------------|
| KIAA1462   | KIAA1462                                                                                               | NM_020848    |
| LAMA4      | Laminin, alpha 4                                                                                       | NM_001105206 |
| LAMB1      | Laminin, beta 1                                                                                        | NM_002291    |
| LAPTM5     | Lysosomal associated multispinning membrane protein 5                                                  | CR607037     |
| LAT1-3TM   |                                                                                                        |              |
| LAT2::NCF1 |                                                                                                        |              |
| LCP1       | Lymphocyte cytosolic protein 1 (L-plastin)                                                             | NM_002298    |
| LEF1       | Lymphoid enhancer-binding factor 1                                                                     | AK128255     |
| LGALS2     | Lectin, galactoside-binding, soluble, 2                                                                | AK130682     |
| LHFP       | Lipoma HMGIC fusion partner                                                                            | NM_005780    |
| LILRB3     |                                                                                                        |              |
| LIPA       | Lipase A, lysosomal acid, cholesterol esterase (Wolman disease)                                        | AK091558     |
| LOC651961  |                                                                                                        |              |
| LRAP       |                                                                                                        |              |
| LSP1       | Lymphocyte-specific protein 1                                                                          | AK056576     |
| LST1       | Leukocyte specific transcript 1                                                                        | BX647293     |
| LTB        | Lymphotoxin beta (TNF superfamily, member 3)                                                           | AK095821     |
| LUM        | Lumican                                                                                                | BG114678     |
| MALAT1     | Metastasis associated lung adenocarcinoma transcript 1 (non-protein coding)                            | EF177381     |
| MEF2C      | Myocyte enhancer factor 2C                                                                             | AL833268     |
| MEG3       |                                                                                                        |              |
| MFAP5      | Microfibrillar associated protein 5                                                                    | NM_003480    |
| MMP1       | Matrix metalloproteinase 1 (interstitial collagenase)                                                  | BC013875     |
| MMP9       | Matrix metalloproteinase 9 (gelatinase B, 92kDa gelatinase, 92kDa type IV collagenase)                 | NM_004994    |
| MS4A4A     | Membrane-spanning 4-domains, subfamily A, member 4                                                     | BX641064     |
| NDN        | Necdin homolog (mouse)                                                                                 | NM_002487    |
| NNMT       | Nicotinamide N-methyltransferase                                                                       | AK097984     |
| NOX4       | NADPH oxidase 4                                                                                        | AK057189     |
| NR2F1      | Nuclear receptor subfamily 2, group F, member 1                                                        | NM_005654    |
| NR4A3      | Nuclear receptor subfamily 4, group A, member 3                                                        | NM_173198    |
| NTN2L      |                                                                                                        |              |
| NTN2L      |                                                                                                        |              |
| PCOLCE2    | Procollagen C-endopeptidase enhancer 2                                                                 | AY358557     |
| PDPN       | Podoplanin                                                                                             | NM_006474    |
| PLA2G2A    | Phospholipase A2, group IIA (platelets, synovial fluid)                                                | CR609269     |
| PLAU       | Plasminogen activator, urokinase                                                                       | NM_002658    |
| POU2AF1    | POU class 2 associating factor 1                                                                       | Z49194       |
| PRG1       |                                                                                                        |              |
| PRSS23     | Protease, serine, 23                                                                                   | AL832007     |
| PSCDBP     | Pleckstrin homology, Sec7 and coiled-coil domains, binding protein                                     | NM_004288    |
| PTPRC      | Protein tyrosine phosphatase, receptor type, C                                                         | NM_002838    |
| RASSF2     | Ras association (RalGDS/AF-6) domain family member 2                                                   | AY154470     |
| RASSF4     | Ras association (RalGDS/AF-6) domain family member 4                                                   | AB209446     |
| RGS1       | Regulator of G-protein signaling 1                                                                     | NM_002922    |
| RGS5       | Regulator of G-protein signaling 5                                                                     | NM_003617    |
| RNASE1     | Ribonuclease, RNase A family, 1 (pancreatic)                                                           | CF595800     |
| SAMD9L     | Sterile alpha motif domain containing 9-like                                                           | NM_152703    |
| SERPINF1   | Serpin peptidase inhibitor, clade F (alpha-2 antiplasmin, pigment epithelium derived factor), member 1 | BM918904     |
| SLC1A3     | Solute carrier family 1 (glial high affinity glutamate transporter), member 3                          | NM_004172    |
| SLC7A7     | Solute carrier family 7 (cationic amino acid transporter, y+ system), member 7                         | AB209591     |
| SLCO2B1    | Solute carrier organic anion transporter family, member 2B1                                            | AK127289     |
| SLFN11     | Schlafen family member 11                                                                              | NM_001104587 |
| SOCS3      | Suppressor of cytokine signaling 3                                                                     | NM_003955    |
| SPARC      | Secreted protein, acidic, cysteine-rich (osteonectin)                                                  | AK126525     |
| SPON1      | Spondin 1, extracellular matrix protein                                                                | NM_006108    |
| SPP1       | Secreted phosphoprotein 1 (osteopontin, bone sialoprotein I, early T-lymphocyte activation 1)          | BF698898     |
| SULF1      | Sulfatase 1                                                                                            | AF545571     |
| TAGLN      | Transgelin                                                                                             | AB209555     |
| TBC1D10C   | TBC1 domain family, member 10C                                                                         | AK122585     |
| THBS2      | Thrombospondin 2                                                                                       | NM_003247    |
| TIMP3      | TIMP metalloproteinase inhibitor 3 (Sorsby fundus dystrophy, pseudoinflammatory)                       | NM_000362    |
| TIMP3      | TIMP metalloproteinase inhibitor 3 (Sorsby fundus dystrophy, pseudoinflammatory)                       | NM_000362    |
| TMEM49     | Transmembrane protein 49                                                                               | BC053563     |

|        |                                                                    |           |
|--------|--------------------------------------------------------------------|-----------|
| TRPV2  | Transient receptor potential cation channel, subfamily V, member 2 | AK126996  |
| VCAM1  | Vascular cell adhesion molecule 1                                  | CR749464  |
| VSIG4  | V-set and immunoglobulin domain containing 4                       | AY358341  |
| VWF    | Von Willebrand factor                                              | NM_000552 |
| WASPIP |                                                                    |           |
| ZAP70  | Zeta-chain (TCR) associated protein kinase 70kDa                   | BC053878  |
