# Supplementary material
Source: PubMed Central journal article supplement (PMC5527532)

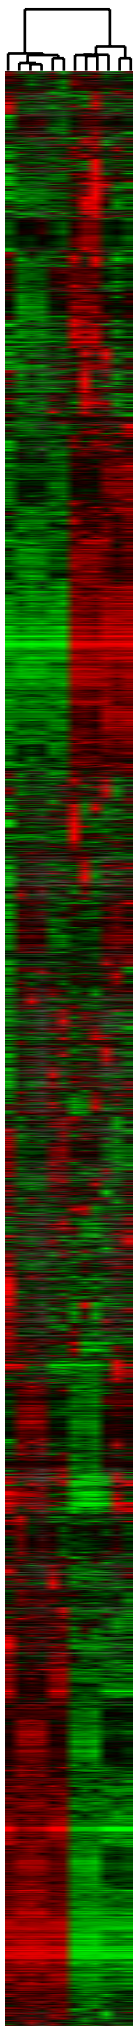

**B** Genes upregulated by MAS98.12 Xengrafts

**A** Genes upregulated by MAS98.06 Xengrafts

Supplement: MOL2-3-469-s001.pdf [file MOL2-3-469-s001.pdf]

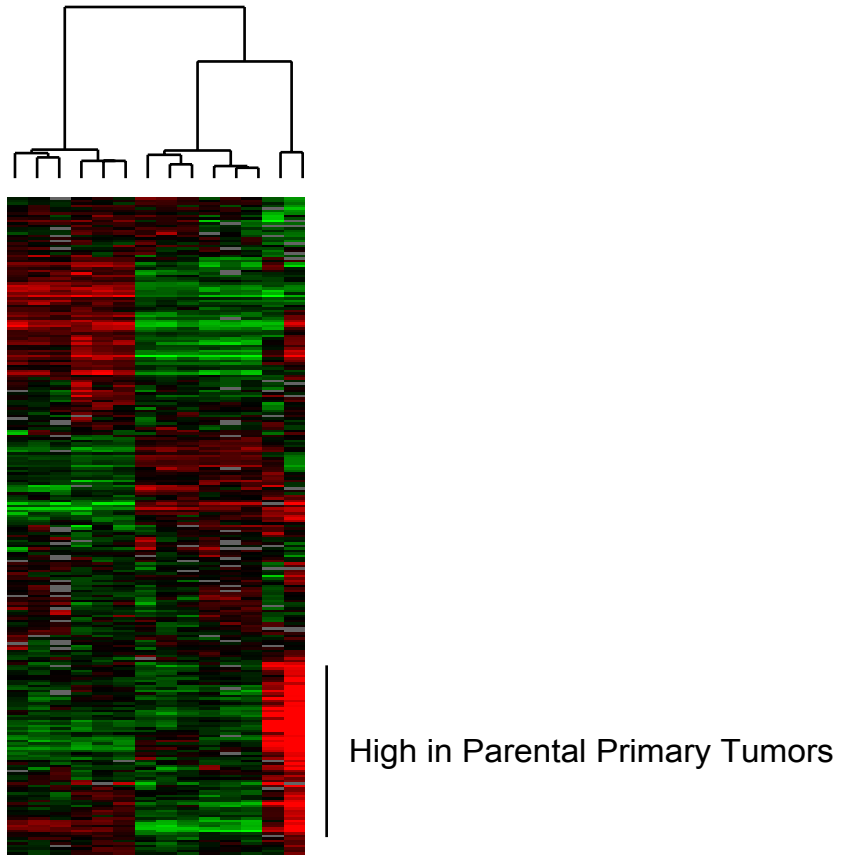

Fig. S3. Bergamasci et al

Supplement: MOL2-3-469-s003.pdf [file MOL2-3-469-s003.pdf]
